# Supplementary material
Source: HighWire-hosted journal article supplement (http://jpet.aspetjournals.org/highwire/filestream/136431/field_highwire_adjunct_files/0/JPET209288_new_FigureS1_schema.pdf)
Supplement: JPET209288_new_FigureS1_schema.pdf [file JPET209288_new_FigureS1_schema.pdf]

Taiki Kida, Keisuke Omori, Masatoshi Hori, Hiroshi Ozaki, and Takahisa Murata  
Stimulation of G Protein-coupled Bile Acid Receptor Enhances Vascular Endothelial  
Barrier Function via Activation of PKA and Rac1  
The Journal of Pharmacology and Experimental Therapeutics

Figure S1

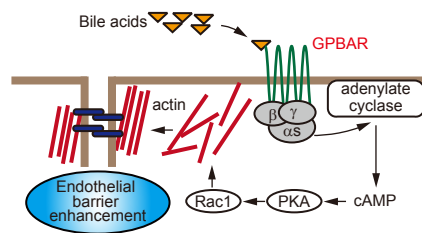

**Supplementary Figure 1**

Mechanism of GPBAR-mediated endothelial barrier enhancement.

Stimulation of GPBAR increases intracellular cAMP, leading to activation of PKA and Rac1.

Activated Rac1 rearranges actin cytoskeleton to enhance endothelial barrier function.
